# Supplementary figures and images for: Spatial and temporal regulation of coronary vessel formation by calcineurin-NFAT signaling
Source: Oxford University Press journal article supplement (doi:10.1242/dev.037903), 2009-08-27

VEGF expression is not affected in the absence of endothelial Cnb1

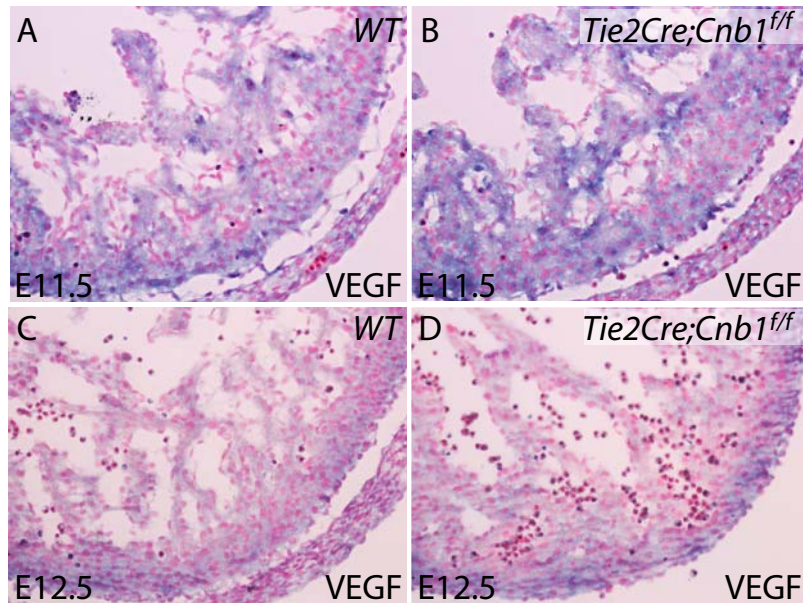

Supplement: dev037903figs3.pdf [file dev037903figs3.pdf]
